# Supplementary material for: In situ generated nickel on cerium oxide nanoparticle for efficient catalytic reduction of 4-nitrophenol
Source: Royal Society of Chemistry journal article supplement (doi:10.1039/c6ra04120e), 2016-01-01
Supplement: c6ra04120e1.pdf [file c6ra04120e1.pdf]

## Supporting Information

# *In situ* generated nickel on cerium oxide nanoparticle for efficient catalytic reduction of 4-nitrophenol

S. Vivek<sup>§</sup>, P. Arunkumar<sup>§</sup> and K. Suresh Babu\*

Centre for Nanoscience and Technology, Madanjeet School of Green Energy Technology, Pondicherry University, Puducherry, India

\*Corresponding author: email- [sureshbabu.nst@pondiuni.edu.in](mailto:sureshbabu.nst@pondiuni.edu.in)

Phone: +91-413-2654976

<sup>§</sup>Equally contributed to the work

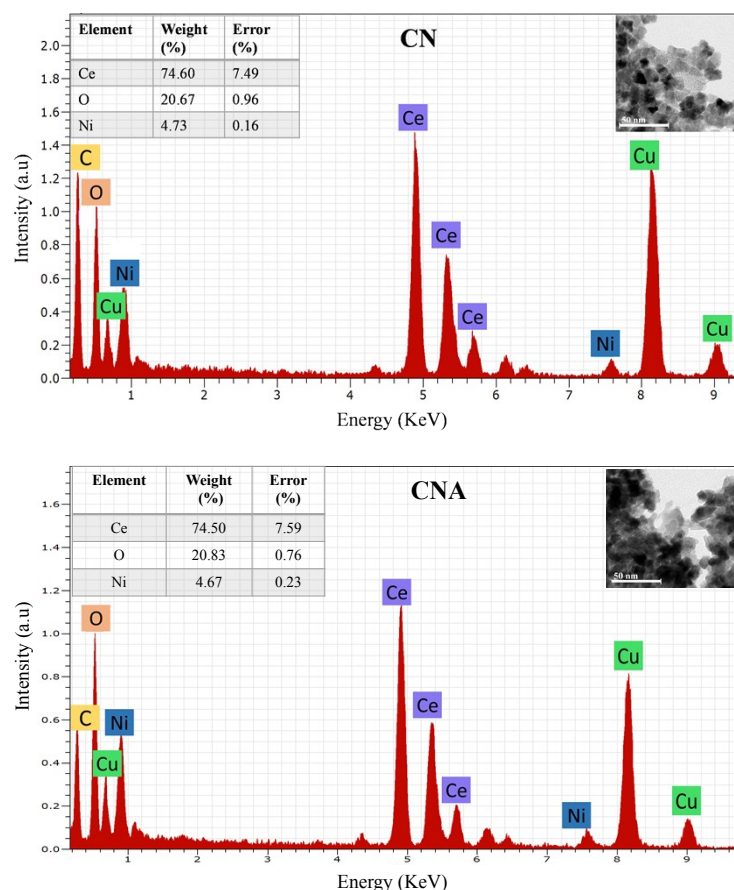

Sup  
ple

mentary Figure 1.EDX spectra for CN and CNA showing the presence of Ni, Ce and O (taken

from FEI-Tecnai G<sup>2</sup> 20 S-TWIN operated at 200 keV attached with Bruker XFlash 6T130 EDX Detector).

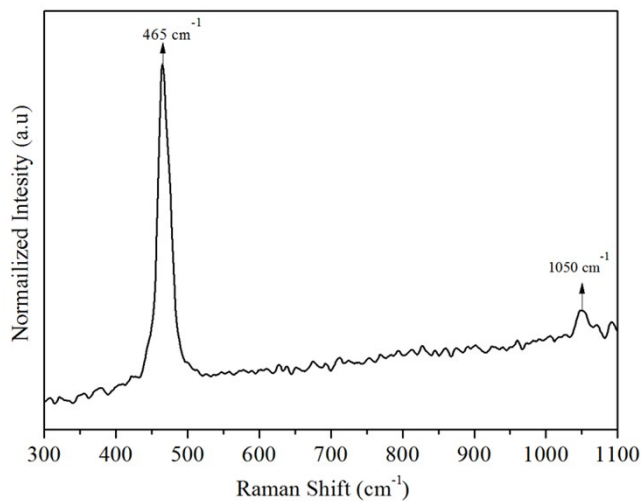

**Supplementary Figure 2.** Raman spectroscopy of CN catalyst dispersed in water.

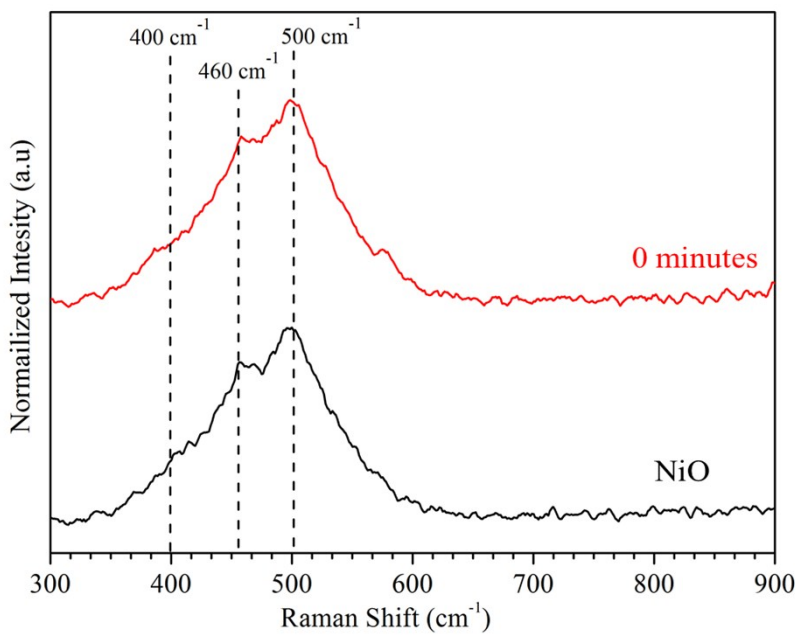

**Supplementary Figure 3.** The Raman Spectra of pure NiO dispersed in water and 0 minutes indicates the spectra taken subsequently after the addition of NaBH<sub>4</sub>.

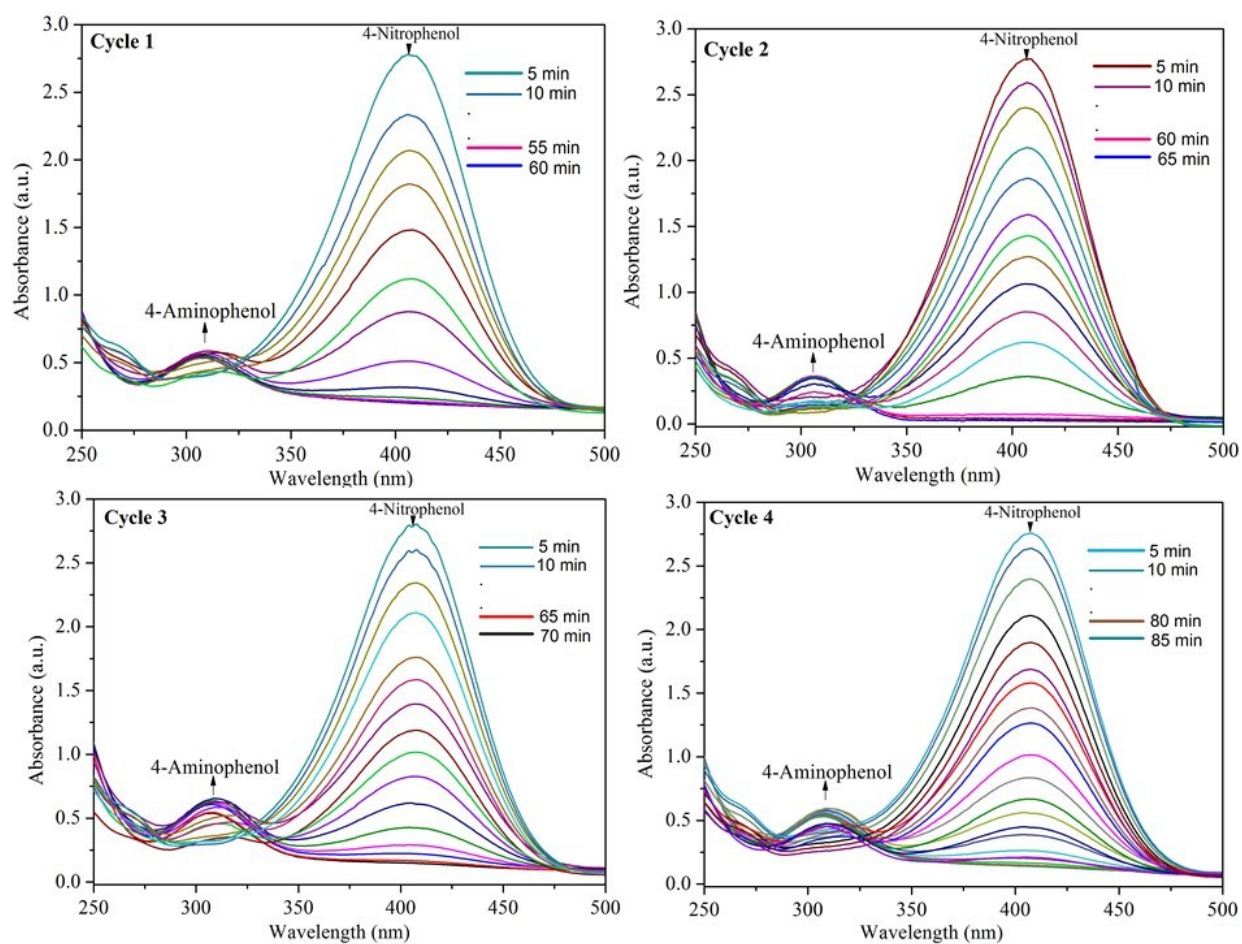

**Supplementary Figure 4.** UV-Visible Spectroscopy of four consecutive recyclability cycles using CN as catalyst for the reduction of 4-nitrophenol to 4-Aminophenol.
